# Supplementary material for: Quinacrine Ameliorates Cisplatin-Induced Renal Toxicity via Modulation of Sirtuin-1 Pathway
Source: MDPI journal article supplement (doi:10.3390/ijms221910660), 2021-10-01
Supplement: s1 [file s1]

## Supplementary Data:

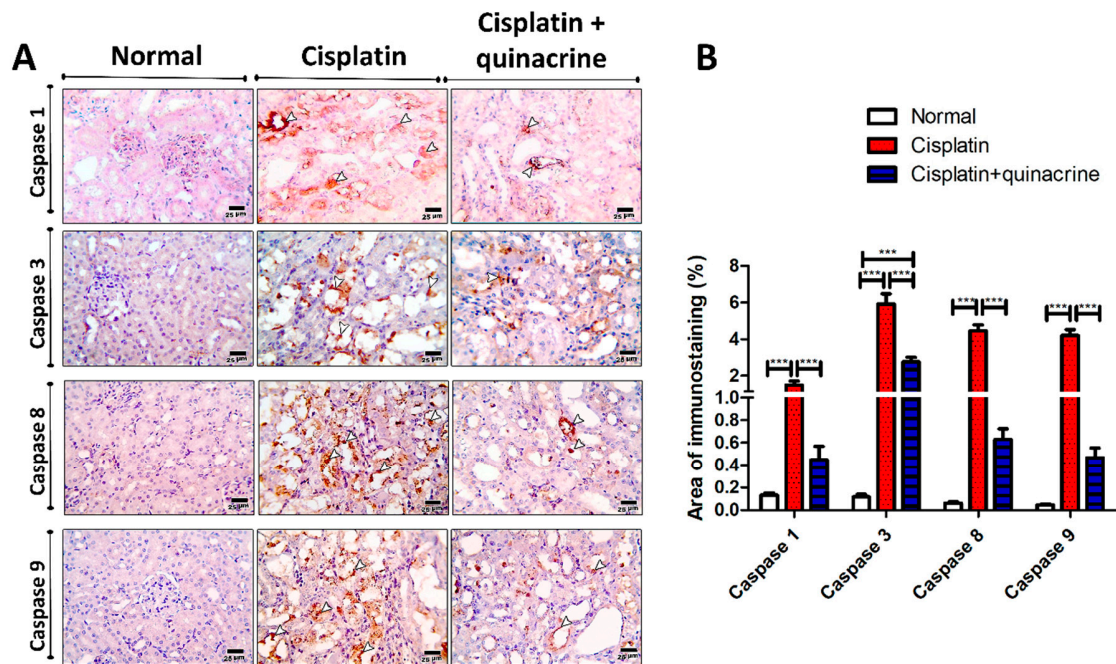

**Supplementary Figure S1:** Quinacrine attenuated cisplatin-induced apoptosis. A) Microscopic pictures of immunostained renal sections against caspases 1,3, 8 & 9; Arrowheads point to positive brown reaction; High magnification X:400 bar 25. B) area of immunostaining of caspases 1,3,8 & 9 (%) (n=6). \*\*\*P<0.001. Data are expressed: mean±SEM
